# Supplementary material for: MiR-16-5p suppresses breast cancer proliferation by targeting ANLN
Source: PubMed Central journal article supplement (PMC8574041; doi:10.1186/s12885-021-08914-1), 2021-11-07

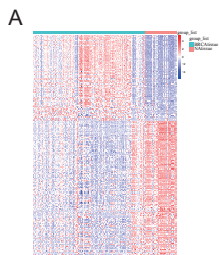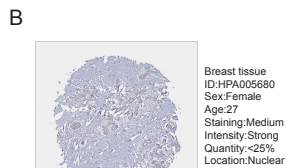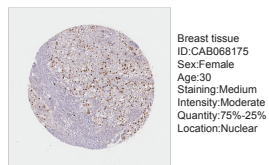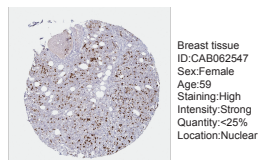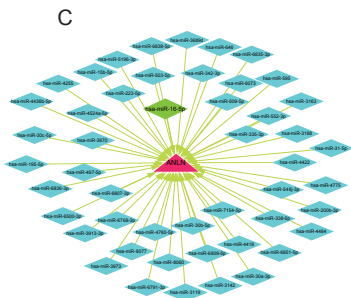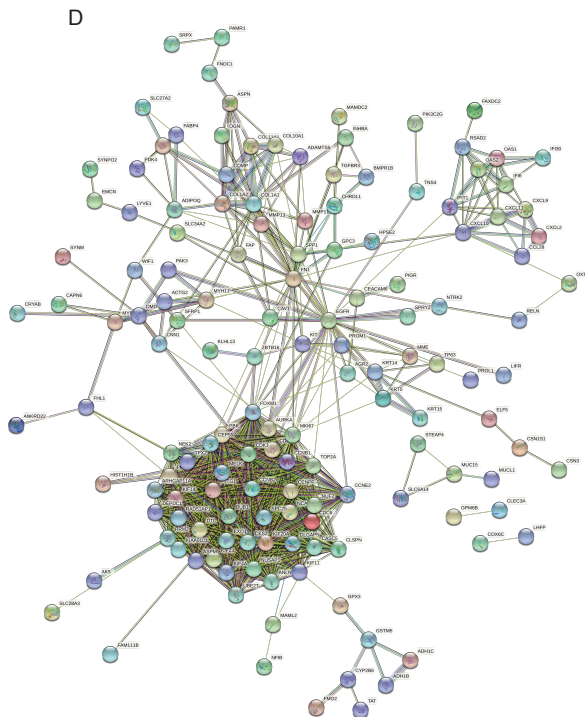

Supplement: 12885_2021_8914_MOESM1_ESM.pdf [file 12885_2021_8914_MOESM1_ESM.pdf]
