# Supplementary material for: MiR-16-5p suppresses breast cancer proliferation by targeting ANLN
Source: PubMed Central journal article supplement (PMC8574041; doi:10.1186/s12885-021-08914-1), 2021-11-07
Supplement: 12885_2021_8914_MOESM2_ESM.pdf [file 12885_2021_8914_MOESM2_ESM.pdf]

Table S1. GO and KEGG enrichment analysis of 195 DEGs

|      | ID         | Description                                               | pValue      | FDR         | Count |
|------|------------|-----------------------------------------------------------|-------------|-------------|-------|
| BP   | GO:0000280 | nuclear division                                          | 7.86E-13    | 1.17E-09    | 25    |
| BP   | GO:0140014 | mitotic nuclear division                                  | 7.91E-13    | 1.17E-09    | 21    |
| BP   | GO:0048285 | organelle fission                                         | 8.09E-12    | 8.00E-09    | 25    |
| BP   | GO:0000070 | mitotic sister chromatid segregation                      | 6.66E-10    | 4.75E-07    | 14    |
| BP   | GO:0007059 | chromosome segregation                                    | 8.16E-10    | 4.75E-07    | 19    |
| BP   | GO:0000819 | sister chromatid segregation                              | 9.60E-10    | 4.75E-07    | 15    |
| BP   | GO:0098813 | nuclear chromosome segregation                            | 1.60E-09    | 6.47E-07    | 17    |
|      | GO:1902850 | microtubule cytoskeleton organization involved in mitosis | 1.74E-09    | 6.47E-07    | 13    |
| BP   | GO:0007052 | mitotic spindle organization                              | 2.30E-08    | 7.60E-06    | 11    |
| BP   | GO:0007088 | regulation of mitotic nuclear division                    | 7.40E-08    | 2.20E-05    | 12    |
| CC   | GO:0030496 | midbody                                                   | 2.70E-08    | 6.87E-06    | 13    |
| CC   | GO:0005819 | spindle                                                   | 1.18E-07    | 1.50E-05    | 17    |
|      | GO:0000779 | condensed chromosome, centromeric region                  | 3.02E-06    | 0.000222736 | 9     |
| CC   | GO:0005876 | spindle microtubule                                       | 3.51E-06    | 0.000222736 | 7     |
| CC   | GO:0000922 | spindle pole                                              | 5.01E-06    | 0.000254695 | 10    |
| CC   | GO:0000793 | condensed chromosome                                      | 1.16E-05    | 0.000489437 | 11    |
| CC   | GO:0072686 | mitotic spindle                                           | 4.76E-05    | 0.001728244 | 8     |
|      | GO:0000307 | cyclin-dependent protein kinase holoenzyme complex        | 5.85E-05    | 0.001812418 | 5     |
| CC   | GO:0045171 | intercellular bridge                                      | 6.58E-05    | 0.001812418 | 6     |
|      | GO:0062023 | collagen-containing extracellular matrix                  | 7.76E-05    | 0.001812418 | 14    |
| CC   | GO:0005201 | extracellular matrix structural constituent               | 3.81E-06    | 0.001213709 | 10    |
| MF   | GO:0008017 | microtubule binding                                       | 6.54E-06    | 0.001213709 | 12    |
| MF   | GO:0045236 | CXCR chemokine receptor binding                           | 1.92E-05    | 0.002374527 | 4     |
| MF   | GO:0008307 | structural constituent of muscle                          | 4.53E-05    | 0.004198416 | 5     |
| MF   | GO:0008009 | chemokine activity                                        | 8.58E-05    | 0.006363712 | 5     |
| MF   | GO:0015631 | tubulin binding                                           | 0.000148209 | 0.00916424  | 12    |
| MF   | GO:0008201 | heparin binding                                           | 0.000174049 | 0.009224584 | 8     |
| KEGG | hsa04512   | ECM-receptor interaction                                  | 5.81E-05    | 0.010449629 | 7     |
| KEGG | hsa04510   | Focal adhesion                                            | 0.000435379 | 0.028232177 | 9     |
| KEGG | hsa04110   | Cell cycle                                                | 0.000494659 | 0.028232177 | 7     |
| KEGG | hsa04114   | Oocyte meiosis                                            | 0.000627382 | 0.028232177 | 7     |
| KEGG | hsa04115   | p53 signaling pathway                                     | 0.001382265 | 0.048719015 | 5     |
| KEGG | hsa02010   | ABC transporters                                          | 0.001623967 | 0.048719015 | 4     |

GO, Gene Ontology; KEGG, Kyoto Encyclopedia of Genes and Genomes; DEGs, Differentially expressed genes; BP, biological process; CC, cellular component; MF, molecular function; FDR, false discovery rate.
