# Supplementary material for: MiR-16-5p suppresses breast cancer proliferation by targeting ANLN
Source: PubMed Central journal article supplement (PMC8574041; doi:10.1186/s12885-021-08914-1), 2021-11-07
Supplement: 12885_2021_8914_MOESM3_ESM.pdf [file 12885_2021_8914_MOESM3_ESM.pdf]

Table S2. Primers in this study

|                      | Sequence (5' → 3')                                                         | Usage                             |
|----------------------|----------------------------------------------------------------------------|-----------------------------------|
| ANLN F               | CTTCTCACCAATGCCATCAG                                                       | qRT-PCR                           |
| ANLN R               | GCGGTACCAGGCTGTTCTTG                                                       | qRT-PCR                           |
| GAPDH F              | ACCACAGTCCATGCCATCAC                                                       | qRT-PCR                           |
| GAPDH R              | TCCACCACCCTGTTGCTGTA                                                       | qRT-PCR                           |
| miR-16-5p<br>F       | CGCGTAGCAGCACGTAAATA                                                       | qRT-PCR                           |
| miR-16-5p<br>R       | AGTGCAGGGTCCGAGGTATT                                                       | qRT-PCR                           |
| miR-16-5p<br>RT      | GTCGTATCCAGTGCAGGGTCCGAGGTATTCGCACTG<br>GATACGACCGCAA                      | qRT-PCR                           |
| U6 F                 | CTCGCTTCGGCAGCACATAT                                                       | qRT-PCR                           |
| U6 R                 | AACGCTTCACGAATTTGCGT                                                       | qRT-PCR                           |
| ANLN<br>3'UTR F      | CTTTATATTAATAAAAGTAAACTGTTATGAAGCTGCTA<br>TGTACTAATAATACTTTGCTTGCCC        | Dual-Luciferase<br>Reporter Assay |
| ANLN<br>3'UTR R      | TCGAGGGCAAGCAAAGTATTATTAGTACATAGCAGC<br>TTCATAACAGTTTACTTTTTTAATATAAAGAGCT | Dual-Luciferase<br>Reporter Assay |
| ANLN mut<br>3' UTR F | CTTTATATTAATAAAAGTAAACTGTTATGAAATCATCG<br>TGTACTAATAATACTTTGCTTGCCC        | Dual-Luciferase<br>Reporter Assay |
| ANLN mut<br>3' UTR R | TCGAGGGCAAGCAAAGTATTATTAGTACACGATGATT<br>TCATAACAGTTTACTTTTTTAATATAAAGAGCT | Dual-Luciferase<br>Reporter Assay |
| miR-16-5p<br>mimics  | UAGCAGCACGUAAAUAUUGGCG                                                     | overexpression                    |
| si-ANLN1             | GCAGAUACCAUCAGUGAUUTT<br>AAUCACUGAUGGUAUCUGCTT                             | knockdown                         |
| si-ANLN2             | CCAGACCUCUGCUUUCAATT<br>UUUGAAAGCAGAGGUCUGGTT                              | knockdown                         |
| si-ANLN3             | GCUACAUUCUGUCCCAAATT<br>UUUGGGAACAGAAUGUAGCTT                              | knockdown                         |
