# Supplementary material for: MiR-16-5p suppresses breast cancer proliferation by targeting ANLN
Source: PubMed Central journal article supplement (PMC8574041; doi:10.1186/s12885-021-08914-1), 2021-11-07
Supplement: 12885_2021_8914_MOESM4_ESM.pdf [file 12885_2021_8914_MOESM4_ESM.pdf]

Table S3. Datasets of breast cancer (BC)

|          | Annotation platform/package                                                               | Sample information                        |
|----------|-------------------------------------------------------------------------------------------|-------------------------------------------|
| GSE86374 | GPL6244 [HuGene-1_0-st] Affymetrix Human Gene<br>1.0 ST Array [transcript (gene) version] | 124 BC tissues and<br>35 normal tissues   |
| GSE29431 | [HG-U133_Plus_2] Affymetrix Human Genome<br>U133 Plus 2.0 Array                           | 54 BC tissues and 12<br>normal tissues    |
| GSE42568 | GPL570 [HG-U133_Plus_2] Affymetrix Human<br>Genome U133 Plus 2.0 Array                    | 104 BC tissues and<br>17 normal tissues   |
| TCGA     | Homo_sapiens.GRCh38.103.chr.gtf                                                           | 1104 BC tissues and<br>113 normal tissues |
